# Supplementary material for: Suppressing non-radiative recombination for efficient and stable perovskite solar cells
Source: Royal Society of Chemistry journal article supplement (doi:10.1039/d4ee02917h), 2024-11-29
Supplement: d4ee02917h1.pdf [file d4ee02917h1.pdf]

## Supplementary Information for

### **Suppressing non-radiative recombination for efficient and stable perovskite solar cells**

Jiahua Tao<sup>1</sup>, Chunhu Zhao<sup>1,2\*</sup>, Zhaojin Wang<sup>3,4</sup>, You Chen<sup>3,4</sup>, Lele Zang<sup>1</sup>, Guang Yang<sup>5</sup>, Yang Bai<sup>3,4\*</sup>, Junhao Chu<sup>1,6</sup>

<sup>1</sup>Engineering Research Center for Nanophotonics and Advanced Instrument, Key Laboratory of Polar Materials and Devices, Ministry of Education, School of Physics and Electronic Science, East China Normal University, Shanghai 200241, China

<sup>2</sup>Hunan Key Laboratory of Carbon Neutrality and Intelligent Energy, **Research Institute of New Energy and Novel Energy Storage**, School of Resource and Environment, Hunan University of Technology and Business, Changsha 410205, China

<sup>3</sup>Faculty of Materials Science and Energy Engineering, Shenzhen University of Advanced Technology, Shenzhen 518107, China

<sup>4</sup>Institute of Technology for Carbon Neutrality, Shenzhen Institute of Advanced Technology, Chinese Academy of Sciences, Shenzhen 518055, China

<sup>5</sup>Department of Electrical and Electronic Engineering, Photonic Research Institute, Research Institute of Smart Energy, Research Institute for Advanced Manufacturing, The Hong Kong Polytechnic University, Hung Hom, Kowloon, Hong Kong 999077, China

<sup>6</sup>National Laboratory for Infrared Physics, Shanghai Institute of Technical Physics of the Chinese Academy of Science Shanghai 200083, China

\*E-mail: [chzhao@hutb.edu.cn](mailto:chzhao@hutb.edu.cn); [y.bai@siat.ac.cn](mailto:y.bai@siat.ac.cn)

**Supplementary Table 1 | Photovoltaic parameters of single-junction perovskite solar cells. \*Certified PCE.**

| Year | Polarity     | Device configuration                                                                                                                           | $V_{OC}$ (V) | $J_{SC}$ ( $\text{mA cm}^{-2}$ ) | FF (%) | PCE (%) | Ref. |
|------|--------------|------------------------------------------------------------------------------------------------------------------------------------------------|--------------|----------------------------------|--------|---------|------|
| 2012 | <i>n-i-p</i> | Ag/Spiro-OMeTAD/MAPbI <sub>2</sub> Cl/cTiO <sub>2</sub> /FTO                                                                                   | 0.98         | 17.8                             | 63.0   | 10.9    | 1    |
| 2013 | <i>n-i-p</i> | Au/Spiro-OMeTAD/MAPbI <sub>3</sub> /mTiO <sub>2</sub> /FTO                                                                                     | 1.00         | 21.3                             | 66.0   | 14.1*   | 2    |
| 2013 | <i>n-i-p</i> | Ag/Spiro-OMeTAD/MAPbI <sub>3-x</sub> Cl <sub>x</sub> /cTiO <sub>2</sub> /FTO                                                                   | 1.07         | 21.5                             | 68.0   | 15.4    | 3    |
| 2014 | <i>n-i-p</i> | Ag/Spiro-OMeTAD/MAPbI <sub>3</sub> /ZnO/ITO                                                                                                    | 1.03         | 20.4                             | 74.9   | 15.7    | 4    |
| 2014 | <i>n-i-p</i> | Au/PTAA/MAPb(I <sub>1-x</sub> Br <sub>x</sub> ) <sub>3</sub> /mTiO <sub>2</sub> /FTO                                                           | 1.11         | 19.6                             | 74.2   | 16.2*   | 5    |
| 2014 | <i>n-i-p</i> | Au/Spiro-OMeTAD/MAPbI <sub>3-x</sub> Cl <sub>x</sub> /Y-TiO <sub>2</sub> /PEIE/ITO                                                             | 1.13         | 22.7                             | 75.0   | 19.3    | 6    |
| 2015 | <i>p-i-n</i> | Ag/Ti(Nb)O <sub>x</sub> /PCBM/MAPbI <sub>3</sub> /NiMgLiO/FTO                                                                                  | 1.09         | 20.9                             | 66.8   | 15.0*   | 7    |
| 2015 | <i>n-i-p</i> | Au/PTAA/MAPbI <sub>3</sub> /Zn <sub>2</sub> SnO <sub>4</sub> /ITO                                                                              | 1.06         | 21.6                             | 66.8   | 15.3    | 8    |
| 2015 | <i>n-i-p</i> | Au/Spiro-OMeTAD/MAPbI <sub>3</sub> /SnO <sub>2</sub> /FTO                                                                                      | 1.11         | 23.3                             | 67.0   | 17.2    | 9    |
| 2015 | <i>n-i-p</i> | Au/PTAA/FAPbI <sub>3</sub> /mTiO <sub>2</sub> /FTO                                                                                             | 1.06         | 24.7                             | 77.0   | 20.1*   | 10   |
| 2016 | <i>p-i-n</i> | Ag/Ti(Nb)O <sub>x</sub> /PCBM/FA <sub>0.85</sub> MA <sub>0.15</sub> Pb(I <sub>0.85</sub> Br <sub>0.15</sub> ) <sub>3</sub> /NiO <sub>x</sub> / | 1.08         | 21.9                             | 78.4   | 18.2*   | 11   |

|      |              | FTO                                                                                                                                                       |      |      |      |           |    |
|------|--------------|-----------------------------------------------------------------------------------------------------------------------------------------------------------|------|------|------|-----------|----|
| 2016 | <i>n-i-p</i> | Au/Spiro-<br>OMeTAD/(FAPbI <sub>3</sub> ) <sub>0.97</sub> (MA<br>PbBr <sub>3</sub> ) <sub>0.03</sub> /SnO <sub>2</sub> /ITO                               | 1.07 | 24.3 | 76.6 | 19.9<br>* | 12 |
| 2016 | <i>n-i-p</i> | Au/Spiro-<br>OMeTAD/RbCsMAFAPbI <sub>3</sub><br>/mTiO <sub>2</sub> /cTiO <sub>2</sub> /FTO                                                                | 1.18 | 22.6 | 81.0 | 21.6      | 13 |
| 2017 | <i>n-i-p</i> | Au/Spiro-<br>OMeTAD/MA <sub>0.33</sub> FA <sub>0.67</sub> Pb(<br>Br <sub>0.17</sub> I <sub>0.83</sub> ) <sub>3</sub> /Nb <sub>2</sub> O <sub>5</sub> /ITO | 1.06 | 24.7 | 71.1 | 18.6      | 14 |

Continued from the previous page.

| Year | Polarity     | Device configuration                                                                                                                                                   | $V_{OC}$ (V) | $J_{SC}$ ( $\text{mA cm}^{-2}$ ) | FF (%) | PCE (%) | Ref. |
|------|--------------|------------------------------------------------------------------------------------------------------------------------------------------------------------------------|--------------|----------------------------------|--------|---------|------|
| 2017 | <i>n-i-p</i> | Au/Spiro-OMeTAD/(FAPbI <sub>3</sub> ) <sub>1-x</sub> (MAPbBr <sub>3</sub> ) <sub>x</sub> /SnO <sub>2</sub> /ITO                                                        | 1.12         | 24.0                             | 78.0   | 20.9*   | 15   |
| 2017 | <i>n-i-p</i> | Au/PDCBT/Ta-WO <sub>x</sub> /FA <sub>0.83</sub> MA <sub>0.17</sub> Pb <sub>1.1</sub> Br <sub>0.5</sub> I <sub>2.8</sub> /C <sub>60</sub> -SAM/ITO                      | 1.17         | 22.7                             | 80.0   | 21.2    | 16   |
| 2017 | <i>n-i-p</i> | Au/PTAA/MAPbI <sub>3</sub> /(La)BaSnO <sub>3</sub> /FTO                                                                                                                | 1.12         | 23.4                             | 81.3   | 21.3    | 17   |
| 2017 | <i>n-i-p</i> | Au/PTAA/FAPbI <sub>3</sub> /mTiO <sub>2</sub> /cTiO <sub>2</sub> /FTO                                                                                                  | 1.10         | 25.0                             | 80.3   | 22.1*   | 18   |
| 2018 | <i>n-i-p</i> | Au/Spiro-OMeTAD/MAPbI <sub>3</sub> /ZnO/ITO                                                                                                                            | 1.13         | 22.9                             | 77.1   | 19.9    | 19   |
| 2018 | <i>p-i-n</i> | Ag/PCBM/ZrAcac/CsMAFAPbI <sub>3</sub> /NiO <sub>x</sub> /ITO                                                                                                           | 1.12         | 23.2                             | 80.3   | 20.9    | 20   |
| 2018 | <i>n-i-p</i> | Au/DM/(FAPbI <sub>3</sub> ) <sub>0.95</sub> (MAPbBr <sub>3</sub> ) <sub>0.05</sub> /mTiO <sub>2</sub> /cTiO <sub>2</sub> /FTO                                          | 1.13         | 24.9                             | 80.5   | 22.6*   | 21   |
| 2019 | <i>p-i-n</i> | Cu/BCP/MeO-2PACz/Cs <sub>0.05</sub> (MA <sub>0.17</sub> FA <sub>0.83</sub> ) <sub>0.95</sub> Pb(I <sub>0.83</sub> Br <sub>0.17</sub> ) <sub>3</sub> /SAM/ITO           | 1.16         | 21.8                             | 80.9   | 20.4*   | 22   |
| 2019 | <i>n-i-p</i> | Au/P3HT/(FAPbI <sub>3</sub> ) <sub>0.95</sub> (MAPbBr <sub>3</sub> ) <sub>0.05</sub> /mTiO <sub>2</sub> /cTiO <sub>2</sub> /FTO                                        | 1.14         | 24.9                             | 79.6   | 22.7*   | 23   |
| 2019 | <i>n-i-p</i> | Au/Spiro-OMeTAD/PEAI/FA <sub>1-x</sub> MA <sub>x</sub> PbI <sub>3</sub> /SnO <sub>2</sub> /ITO                                                                         | 1.18         | 25.2                             | 78.4   | 23.3*   | 24   |
| 2020 | <i>n-i-p</i> | Au/Spiro-OMeTAD/Cs <sub>0.05</sub> (MA <sub>0.15</sub> FA <sub>0.85</sub> ) <sub>0.95</sub> Pb(I <sub>0.85</sub> Br <sub>0.15</sub> ) <sub>3</sub> /Zn <sub>2</sub> Sn | 1.14         | 23.6                             | 79.0   | 21.3    | 25   |

|      |              |                                                                                                                          |      |      |      |           |    |
|------|--------------|--------------------------------------------------------------------------------------------------------------------------|------|------|------|-----------|----|
|      |              | O <sub>4</sub> /FTO                                                                                                      |      |      |      |           |    |
| 2020 | <i>p-i-n</i> | Ag/BCP/PCBM/CsMAFAP<br>bI <sub>3</sub> /F2HCNQ/NiO <sub>x</sub> /ITO                                                     | 1.14 | 23.4 | 82.8 | 22.1      | 26 |
| 2020 | <i>n-i-p</i> | Au/Spiro-<br>OMeTAD/MA <sub>x</sub> FA <sub>1-x</sub> Pb(I <sub>1-x</sub><br>Br <sub>x</sub> ) <sub>3</sub> /ZnO-KCl/ITO | 1.17 | 24.0 | 80.0 | 22.6      | 27 |
| 2020 | <i>n-i-p</i> | Au/Spiro-<br>OMeTAD/(FAPbI <sub>3</sub> ) <sub>1-x</sub><br>(MC) <sub>x</sub> /mTiO <sub>2</sub> /cTiO <sub>2</sub> /FTO | 1.16 | 26.2 | 80.1 | 24.4<br>* | 28 |
| 2020 | <i>n-i-p</i> | Au/Spiro-<br>mF/FAPbI <sub>3</sub> /mTiO <sub>2</sub> /cTiO <sub>2</sub> /F<br>TO                                        | 1.18 | 26.2 | 79.6 | 24.6<br>* | 29 |

Continued from the previous page.

| Year | Polarity     | Device configuration                                                                                                                                                                                        | $V_{OC}$ (V) | $J_{SC}$ (mA cm <sup>-2</sup> ) | FF (%) | PCE (%) | Ref. |
|------|--------------|-------------------------------------------------------------------------------------------------------------------------------------------------------------------------------------------------------------|--------------|---------------------------------|--------|---------|------|
| 2021 | <i>n-i-p</i> | Ag/TPBI/VO <sub>x</sub> /Spiro-TTB/Cs <sub>0.05</sub> MA <sub>0.15</sub> FA <sub>0.8</sub> Pb(I <sub>0.85</sub> Br <sub>0.15</sub> ) <sub>3</sub> /Nb <sub>2</sub> O <sub>5</sub> /C <sub>60</sub> -SAM/ITO | 1.15         | 24.0                            | 76.8   | 21.3    | 30   |
| 2021 | <i>p-i-n</i> | Ag/BCP/C <sub>60</sub> /Cs <sub>0.18</sub> FA <sub>0.82</sub> PbI <sub>3</sub> /2PACz/ITO                                                                                                                   | 1.16         | 23.5                            | 83.2   | 22.7    | 31   |
| 2021 | <i>n-i-p</i> | Au/Spiro-OMeTAD/OAI/FAPbI <sub>3</sub> /mTiO <sub>2</sub> /cTiO <sub>2</sub> /FTO                                                                                                                           | 1.17         | 26.2                            | 81.8   | 25.2*   | 32   |
| 2021 | <i>n-i-p</i> | Au/Spiro-OMeTAD/FAMAPb(I,Cl) <sub>3</sub> /SnO <sub>2</sub> /FTO                                                                                                                                            | 1.18         | 25.1                            | 84.8   | 25.2*   | 33   |
| 2021 | <i>n-i-p</i> | Au/Spiro-OMeTAD/MeO-PEAI/FAMAPb(I,Cl) <sub>3</sub> /SnO <sub>2</sub> /FTO                                                                                                                                   | 1.19         | 25.7                            | 83.2   | 25.5*   | 34   |
| 2022 | <i>p-i-n</i> | Ag/BCP/C <sub>60</sub> /FcTc <sub>2</sub> /Cs <sub>0.05</sub> (MA <sub>0.02</sub> FA <sub>0.98</sub> ) <sub>0.95</sub> Pb(I <sub>0.98</sub> Br <sub>0.02</sub> ) <sub>3</sub> /PTAA/ITO                     | 1.18         | 25.6                            | 80.6   | 24.3*   | 35   |
| 2022 | <i>n-i-p</i> | Au/MoO <sub>3</sub> /Spiro-OMeTAD/Cs <sub>0.15</sub> FA <sub>0.85</sub> Pb(I <sub>0.95</sub> Br <sub>0.017</sub> Cl <sub>0.033</sub> ) <sub>3</sub> /SnO <sub>2</sub> /FTO                                  | 1.18         | 25.3                            | 84.6   | 24.5*   | 36   |
| 2022 | <i>n-i-p</i> | Au/Spiro-OMeTAD-TFSI/FAPbI <sub>3</sub> /SnO <sub>2</sub> /ITO                                                                                                                                              | 1.16         | 26.5                            | 81.4   | 25.0*   | 37   |
| 2023 | <i>p-i-n</i> | Ag/BCP/PCBM/FcTc <sub>2</sub> /Cs <sub>0.05</sub> FA <sub>0.95</sub> PbI <sub>3</sub> /Al <sub>2</sub> O <sub>3</sub> /PTAA/NiO <sub>x</sub> /ITO                                                           | 1.17         | 25.7                            | 81.6   | 24.6*   | 38   |
| 2023 | <i>p-i-n</i> | Ag/BCP/C <sub>60</sub> /Cs <sub>0.05</sub> (MA <sub>0.05</sub> FA <sub>0.95</sub> ) <sub>0.95</sub> Pb(I <sub>0.95</sub> Br <sub>0.05</sub> ) <sub>3</sub> /MPA-CPA/ITO                                     | 1.21         | 24.8                            | 84.7   | 25.4*   | 39   |

|      |              |                                                                                        |       |       |      |           |    |
|------|--------------|----------------------------------------------------------------------------------------|-------|-------|------|-----------|----|
| 2023 | <i>p-i-n</i> | Ag/BCP/C <sub>60</sub> /CF3-<br>PEAMAI/perovskite/MeO-<br>4PADBC/NiO <sub>x</sub> /ITO | 1.19  | 25.4  | 84.6 | 25.6<br>* | 40 |
| 2023 | <i>n-i-p</i> | Au/Spiro-<br>OMeTAD/FAPbI <sub>3</sub> /SnO <sub>2</sub> /IT<br>O                      | 1.18  | 25.6  | 85.1 | 25.7<br>* | 41 |
| 2024 | <i>p-i-n</i> | Ag/C <sub>60</sub> /SnO <sub>2</sub> /perovskite/SA<br>Ms/FTO                          | 1.174 | 26.13 | 85.2 | 26.1<br>* | 42 |

**Continued from the previous page.**

| Year | Polarity     | Device configuration                                              | $V_{OC}$<br>(V) | $J_{SC}$<br>(mA cm <sup>-2</sup> ) | FF<br>(%) | PCE<br>(%) | Ref. |
|------|--------------|-------------------------------------------------------------------|-----------------|------------------------------------|-----------|------------|------|
| 2024 | <i>n-i-p</i> | Au/Spiro-<br>OMeTAD/FAPbI <sub>3</sub> /SnO <sub>2</sub> /IT<br>O | 1.175           | 26.47                              | 84.9<br>4 | 26.4<br>1  | 43   |

**Supplementary Table 2 | Photovoltaic parameters of perovskite-silicon tandem solar cells. Heterojunction solar cell (HJT).**

| Year | Polarity     | Perovskite top cell;<br>Silicon bottom cell                                                                                                                                                            | $V_{OC}$<br>(V) | $J_{SC}$<br>( $\text{mA cm}^{-2}$ ) | FF<br>(%) | PCE<br>(%) | Ref. |
|------|--------------|--------------------------------------------------------------------------------------------------------------------------------------------------------------------------------------------------------|-----------------|-------------------------------------|-----------|------------|------|
| 2016 | <i>n-i-p</i> | $\text{SnO}_2/(\text{FAPbI}_3)_x(\text{MAPbBr}_3)_{1-x}/\text{Spiro-OMeTAD}/\text{MoO}_3/\text{ITO}/\text{Ag}/\text{LiF}; \text{HJT}$                                                                  | 1.79            | 14.0                                | 79.5      | 19.9       | 44   |
| 2016 | <i>n-i-p</i> | $\text{PEIE}/\text{PCBM}/(\text{FAPbI}_3)_x(\text{MAPbBr}_3)_{1-x}/\text{Spiro-OMeTAD}/\text{MoO}_3/\text{ITO}/\text{Au}; \text{HJT}$                                                                  | 1.72            | 16.4                                | 73.1      | 20.5       | 45   |
| 2017 | <i>p-i-n</i> | $\text{NiO}_x/\text{Cs}_{0.17}\text{FA}_{0.83}\text{Pb}(\text{I}_{0.17}\text{Br}_{0.83})_3/\text{PCBM}/\text{SnO}_2/\text{ZTO}/\text{ITO}/\text{Ag}/\text{LiF}; \text{HJT}$                            | 1.65            | 18.1                                | 79.0      | 23.6       | 46   |
| 2018 | <i>p-i-n</i> | $\text{PTAA}/\text{FA}_{0.75}\text{Cs}_{0.25}\text{Pb}(\text{I}_{0.8}\text{Br}_{0.2})_3/\text{C}_{60}/\text{SnO}_2/\text{ITO}/\text{Ag}/\text{MgF}_x; \text{HJT}$                                      | 1.77            | 18.4                                | 77.0      | 25.0       | 47   |
| 2018 | <i>p-i-n</i> | $\text{Spiro-TTB}/\text{Cs}_x\text{FA}_{1-x}\text{Pb}(\text{I},\text{Br})_3/\text{LiF}/\text{C}_{60}/\text{SnO}_x/\text{IZO}/\text{Ag}/\text{MgF}_x; \text{HJT}$                                       | 1.79            | 19.5                                | 73.1      | 25.2       | 48   |
| 2018 | <i>p-i-n</i> | $\text{PTAA}/\text{Cs}_{0.05}(\text{MA}_{0.17}\text{FA}_{0.83})\text{Pb}_{1.1}(\text{I}_{0.83}\text{Br}_{0.17})_3/\text{C}_{60}/\text{SnO}_2/\text{IZO}/\text{LM foil}; \text{HJT}$                    | 1.76            | 18.5                                | 78.5      | 25.5       | 49   |
| 2019 | <i>p-i-n</i> | $\text{Spiro-TTB}/\text{Cs}_x\text{FA}_{1-x}\text{Pb}(\text{I},\text{Br})_3/\text{LiF}/\text{C}_{60}/\text{SnO}_x/\text{IZO}/\text{Ag}/\text{MgF}_x; \text{HJT}$                                       | 1.74            | 19.5                                | 74.7      | 25.1       | 50   |
| 2019 | <i>p-i-n</i> | $\text{PTAA}/\text{Cs}_{0.15}(\text{FA}_{0.83}\text{MA}_{0.17})_{0.85}\text{Pb}(\text{I}_{0.8}\text{Br}_{0.2})_3/\text{ICBA}/\text{C}_{60}/\text{SnO}_x/\text{IZO}/\text{Cu}/\text{MgF}_x; \text{HJT}$ | 1.80            | 17.8                                | 79.4      | 25.4       | 51   |
| 2020 | <i>p-i-n</i> | $\text{PTAA}/\text{Cs}_{0.1}\text{MA}_{0.9}\text{Pb}(\text{I}_{0.9}\text{Br})$                                                                                                                         | 1.82            | 19.2                                | 74.4      | 26.0       | 52   |



|      |              |                                                                                                              |      |      |      |      |    |
|------|--------------|--------------------------------------------------------------------------------------------------------------|------|------|------|------|----|
|      |              | $0.1)_3/C_{60}/SnO_2/ITO/Ag/PD$<br>MS; HJT                                                                   |      |      |      |      |    |
| 2020 | <i>p-i-n</i> | Spiro-<br>OMeTAD/ $(Cs_{0.06}FA_{0.78}MA_{0.16})Pb(I_{0.83}Br_{0.17})_3/mTiO_2/graphene/cTiO_2/FTO$ ;<br>HJT | 1.80 | 18.8 | 77.5 | 26.3 | 53 |

Continued from the previous page.

| Year | Polarity     | Perovskite top cell; Silicon bottom cell                                                                                                                                                            | $V_{OC}$ (V) | $J_{SC}$ ( $\text{mA cm}^{-2}$ ) | FF (%) | PCE (%) | Ref. |
|------|--------------|-----------------------------------------------------------------------------------------------------------------------------------------------------------------------------------------------------|--------------|----------------------------------|--------|---------|------|
| 2020 | <i>p-i-n</i> | NiO <sub>x</sub> /PolyTPD/PFNBr/FA <sub>0.78</sub> Cs <sub>0.22</sub> Pb(I <sub>0.85</sub> Br <sub>0.15</sub> ) <sub>3</sub> /LiF/C <sub>60</sub> /SnO <sub>x</sub> /ITO/Ag/AR foil; HJT            | 1.89         | 19.1                             | 75.3   | 27.0    | 54   |
| 2020 | <i>p-i-n</i> | Me-4PACz/Cs <sub>0.05</sub> (FA <sub>0.77</sub> MA <sub>0.23</sub> ) <sub>0.95</sub> Pb(I <sub>0.77</sub> Br <sub>0.23</sub> ) <sub>3</sub> /LiF/C <sub>60</sub> /SnO <sub>x</sub> /IZO/Ag/LiF; HJT | 1.90         | 19.3                             | 79.5   | 29.2    | 55   |
| 2021 | <i>p-i-n</i> | 2PACz/Cs <sub>0.05</sub> FA <sub>0.8</sub> MA <sub>0.15</sub> Pb(I <sub>0.75</sub> Br <sub>0.25</sub> ) <sub>3</sub> /LiF/C <sub>60</sub> /SnO <sub>x</sub> /IZO/Ag/MgF <sub>x</sub> ; HJT          | 1.87         | 19.6                             | 78.6   | 28.2    | 56   |
| 2022 | <i>p-i-n</i> | PTAA/LiF/Cs <sub>0.1</sub> FA <sub>0.2</sub> MA <sub>0.7</sub> Pb(I <sub>0.85</sub> Br <sub>0.15</sub> ) <sub>3</sub> /C <sub>60</sub> /SnO <sub>2</sub> /ITO/Ag/PDMS; HJT                          | 1.92         | 19.0                             | 78.5   | 28.6    | 57   |
| 2022 | <i>p-i-n</i> | NiO <sub>x</sub> /2PACz/Cs <sub>x</sub> FA <sub>y</sub> MA <sub>1-x-y</sub> Pb(I,Br) <sub>3</sub> /LiF/C <sub>60</sub> /SnO <sub>x</sub> /IZO/Ag/LiF; HJT                                           | 1.79         | 20.1                             | 80.0   | 28.8    | 58   |
| 2022 | <i>p-i-n</i> | 2PACz/Cs <sub>0.05</sub> FA <sub>0.8</sub> MA <sub>0.15</sub> Pb(I <sub>0.755</sub> Br <sub>0.255</sub> ) <sub>3</sub> /MgF <sub>x</sub> /C <sub>60</sub> /SnO <sub>2</sub> /IZO; HJT               | 1.91         | 19.8                             | 77.6   | 29.3    | 59   |
| 2022 | <i>p-i-n</i> | Me-4PACz/Cs <sub>0.05</sub> (FA <sub>0.79</sub> MA <sub>0.21</sub> ) <sub>0.95</sub> Pb(I <sub>0.79</sub> Br <sub>0.21</sub> ) <sub>3</sub> /LiF/C <sub>60</sub> /SnO <sub>x</sub> /IZO/Ag/LiF; HJT | 1.92         | 19.5                             | 79.4   | 29.8    | 60   |
| 2023 | <i>p-i-n</i> | Me-4PACz/Cs <sub>0.05</sub> (FA <sub>0.77</sub> MA <sub>0.23</sub> ) <sub>0.95</sub> Pb(I <sub>0.77</sub> Br <sub>0.23</sub> ) <sub>3</sub> /LiF/C <sub>60</sub> /SnO <sub>2</sub> /IZO/Ag/LiF; HJT | 1.98         | 20.2                             | 81.2   | 32.5    | 61   |

## References

- [1] M. M. Lee, J. Teuscher, T. Miyasaka, T. N. Murakami, H. J. Snaith, *Science* **2012**, 338, 643-647.
- [2] J. Burschka, N. Pellet, S.-J. Moon, R. H.-Baker, P. Gao, M. K. Nazeeruddin, M. Grätzel, *Nature* **2013**, 499, 316-319.
- [3] M. Liu, M. B. Johnston, H. J. Snaith, *Nature* **2013**, 501, 395-398.
- [4] D. Liu, T. L. Kelly, *Nat. Photon.* **2014**, 8, 133-138.
- [5] N. J. Jeon, J. H. Noh, Y. C. Kim, W. S. Yang, S. Ryu, S. I. Seok, *Nat. Mater.* **2014**, 13, 897-903.
- [6] H. Zhou, Q. Chen, G. Li, S. Luo, T.-B. Song, H.-S. Duan, Z. Hong, J. You, Y. Liu, Y. Yang, *Science* **2014**, 345, 542-546.
- [7] W. Chen, Y. Wu, Y. Yue, J. Liu, W. Zhang, X. Yang, H. Chen, E. Bi, I. Ashraful, M. Grätzel, L. Han, *Science* **2015**, 350, 944-948.
- [8] S. S. Shin, W. S. Yang, J. H. Noh, J. H. Suk, N. J. Jeon, J. H. Park, J. S. Kim, W. M. Seong, S. I. Seok, *Nat. Commun.* **2015**, 6, 7410.
- [9] W. Ke, G. Fang, Q. Liu, L. Xiong, P. Qin, H. Tao, J. Wang, H. Lei, B. Li, J. Wan, G. Yang, Y. Yan, *J. Am. Chem. Soc.* **2015**, 137, 6730-6733.
- [10] W. S. Yang, J. H. Noh, N. J. Jeon, Y. C. Kim, S. Ryu, J. Seo, S. I. Seok, *Science* **2015**, 348, 1234-1237.
- [11] Y. Wu, X. Yang, W. Chen, Y. Yue, M. Cai, F. Xie, E. Bi, A. Islam, L. Han, *Nat. Energy* **2016**, 1, 16148.
- [12] Q. Jiang, L. Zhang, H. Wang, X. Yang, J. Meng, H. Liu, Z. Yin, J. Wu, X. Zhang, J. You, *Nat. Energy* **2016** 2, 16177.
- [13] M. Saliba, T. Matsui, K. Domanski, J.-Y. Seo, A. Ummadisingu, S. M. Zakeeruddin, J.-P. Correa-Baena, W. R. Tress, A. Abate, A. Hagfeldt, M. Grätzel, *Science* **2016**, 354, 206-209.
- [14] J. Feng, Z. Yang, D. Yang, X. Ren, X. Zhu, Z. Jin, W. Zi, Q. Wei, S. Liu, *Nano Energy* **2017**, 36, 1-8.
- [15] Q. Jiang, Z. Chu, P. Wang, X. Yang, H. Liu, Y. Wang, Z. Yin, J. Wu, X. Zhang, J. You, *Adv. Mater.* **2017**, 29, 1703852.
- [16] Y. Hou, X. Du, S. Scheiner, D. P. McMeekin, Z. Wang, N. Li, M. S. Killian, H. Chen, M. Richter, I. Levchuk, N. Schrenker, E. Spiecker, T. Stubhan, Norman A. Luechinger, A. Hirsch, P. Schmuki, H.-P. Steinrück, R. H. Fink, M. Halik, H.J. Snaith, C. J. Brabec, *Science* **2017**, 358, 1192-1197.
- [17] S. S. Shin, E. J. Yeom, W. S. Yang, S. Hur, M. G. Kim, J. Im, J. Seo, J. H. Noh, S. I. Seok, *Science* **2017**, 356, 167-171.
- [18] W. S. Yang, B.-W. Park, E. H. Jung, N. J. Jeon, Y. C. Kim, D. Uk Lee, S. S. Shin, J. Seo, E. K. Kim, J. H. Noh, S. I. Seok, *Science* **2017**, 356, 1376-1379.
- [19] R. Azmi, S. Hwang, W. Yin, T.-W. Kim, T. K. Ahn, S.-Y. Jang, *ACS Energy Lett.* **2018**, 3, 1241-1246.
- [20] W. Chen, Y. Zhou, L. Wang, Y. Wu, B. Tu, B. Yu, F. Liu, H.-W. Tam, G. Wang, A. B. Djurišić, L. Huang, Z. He, *Adv. Mater.* **2018**, 30, 1800515.
- [21] N. J. Jeon, H. Na, E. H. Jung, T.-Y. Yang, Y. G. Lee, G. Kim, H.-W. Shin, S. I. Seok, J. Lee, J. Seo, *Nat. Energy* **2018**, 3, 682-689.

- [22] A. A.-Ashouri, A. Magomedov, M. Roß, M. Jošt, M. Talaikis, G. Chistiakov, T. Bertram, J. A. Márquez, E. Köhnen, E. Kasparavičius, S. Levenco, L. G.-Escrig, Charles J. Hages, R. Schlatmann, B. Rech, T. Malinauskas, T. Unold, C. A. Kaufmann, L. Korte, G. Niaura, V. Getautis, S. Albrecht, *Energy Environ. Sci.* **2019**, 12, 3356-3369.
- [23] E. H. Jung, N. J. Jeon, E. Y. Park, C. S. Moon, T. J. Shin, T.-Y. Yang, J. H. Noh, J. Seo, *Nature* **2019**, 567, 511-515.
- [24] Q. Jiang, Y. Zhao, X. Zhang, X. Yang, Y. Chen, Z. Chu, Q. Ye, X. Li, Z. Yin, J. You, *Nat. Photon.* **2019**, 13, 460-466.
- [25] F. Sadegh, S. Akin, M. Moghadam, V. Mirkhani, M.A. R.-Preciado, Z. Wang, M. M. Tavakoli, M. Graetzel, A. Hagfeldt, W. Tress, *Nano Energy* **2020**, 75, 105038.
- [26] P. Ru, E. Bi, Y. Zhang, Y. Wang, W. Kong, Y. Sha, W. Tang, P. Zhang, Y. Wu, W. Chen, X. Yang, H. Chen, L.n Han, *Adv. Energy Mater.* **2020**, 10, 1903487.
- [27] R. Azmi, N. Nurrosyid, S.-H. Lee, M. A. Mubarak, W. Lee, S. Hwang, W. Yin, T. K. Ahn, T.-W. Kim, D. Y. Ryu, Y. R. Do, S.-Y. Jang, *ACS Energy Lett.* **2020**, 5, 1396-1403.
- [28] G. Kim, H. Min, K. S. Lee, D. Y. Lee, S. M. Yoon, S. I. Seok, *Science* **2020**, 370, 108-112.
- [29] M. Jeong, I. W. Choi, E. M. Go, Y. Cho, M. Kim, B. Lee, S. Jeong, Y. Jo, H. W. Choi, J. Lee, J.-H. Bae, S. K. Kwak, D. S. Kim, C. Yang, *Science* **2020**, 369, 1615-1620.
- [30] E. Aydin, J. Liu, E. Ugur, R. Azmi, G. T. Harrison, Y. Hou, B. Chen, S. Zhumagali, M. D. Bastiani, M. Wang, W. Raja, T. G. Allen, A. u. Rehman, A. S. Subbiah, M. Babics, A. Babayigit, F. H. Isikgor, K. Wang, E. V. Kerschaver, L. Tsetseris, E. H. Sargent, F. Laquai, S. D. Wolf, *Energy Environ. Sci.* **2021**, 14, 4377-4390.
- [31] S. Gharibzadeh, P. Fassel, I. M. Hossain, P. Rohrbeck, M. Frericks, M. Schmidt, T. Duong, M. R. Khan, T. Abzieher, B. A. Nejang, F. Schackmar, O. Almora, T. Feeney, R. Singh, D. Fuchs, U. Lemmer, J. P. Hofmann, S. A. L. Weber, U. W. Paetzold, *Energy Environ. Sci.* **2021**, 14, 5875-5893.
- [32] J. Jeong, M. Kim, J. Seo, H. Lu, P. Ahlawat, A. Mishra, Y. Yang, M. A. Hope, F. T. Eickemeyer, M. Kim, Y. J. Yoon, I. W. Choi, B. P. Darwich, S. J. Choi, Y. Jo, J. H. Lee, B. Walker, S. M. Zakeeruddin, L. Emsley, U. Rothlisberger, A. Hagfeldt, D. S. Kim, M. Grätzel, J. Y. Kim, *Nature* **2021**, 592, 381-385.
- [33] J. J. Yoo, G. Seo, M. R. Chua, T. G. Park, Y. Lu, F. Rotermund, Y.-K. Kim, C. S. Moon, N. J. Jeon, J.-P. C.-Baena, V. Bulović, S. S. Shin, M. G. Bawendi, J. Seo, *Nature* **2021**, 590, 587-593.
- [34] H. Min, D. Y. Lee, J. Kim, G. Kim, K. S. Lee, J. Kim, M. J. Paik, Y. K. Kim, K. S. Kim, M. G. Kim, T. J. Shin, S. I. Seok, *Nature* **2021**, 598, 444-450.
- [35] Z. Li, B. Li, X. Wu, S. A. Sheppard, S. Zhang, D. Gao, N. J. Long, Z. Zhu, *Science* **2022**, 376, 416-420.
- [36] Y. Wu, Q. Wang, Y. Chen, W. Qiu, Q. Peng, *Energy Environ. Sci.* **2022**, 15, 4700-4709.

- [37] T. Zhang, F. Wang, H.-B. Kim, I.-W. Choi, C. Wang, E. Cho, R. Konefal, Y. Puttison, K. Terado, L. Kobera, M. Chen, M. Yang, S. Bai, B. Yang, J. Suo, S.-C. Yang, X. Liu, F. Fu, H. Yoshida, W. M. Chen, J. Brus, V. Coropceanu, A. Hagfeldt, J.-L. Brédas, M. Fahlman, D. S. Kim, Z. Hu, F. Gao, *Science* **2022**, 377, 495-501.
- [38] H. Li, C. Zhang, C. Gong, D. Zhang, H. Zhang, Q. Zhuang, X. Yu, S. Gong, X. Chen, J. Yang, X. Li, R. Li, J. Li, J. Zhou, H. Yang, Q. Lin, J. Chu, M. Grätzel, J. Chen, Z. Zang, *Nat. Energy* **2023**, 8, 946-955.
- [39] S. Zhang, F. Ye, X. Wang, R. Chen, H. Zhang, L. Zhan, X. Jiang, Y. Li, X. Ji, S. Liu, M. Yu, F. Yu, Y. Zhang, R. Wu, Z. Liu, Z. Ning, D. Neher, L. Han, Y. Lin, H. Tian, W. Chen, M. Stolterfoht, L. Zhang, W.-H. Zhu, Y. Wu, *Science* **2023**, 380, 404-409.
- [40] Z. Li, X. Sun, X. Zheng, B. Li, D. Gao, S. Zhang, X. Wu, S. Li, J. Gong, J. M. Luther, Z. Li, Z. Zhu, *Science* **2023**, 382, 284-289.
- [41] J. Park, J. Kim, H. S. Yun, M. J. Paik, E. Noh, H. J. Mun, M. G. Kim, T. J. Shin, S. I. Seok, *Nature* **2023**, 616, 724-730.
- [42] H. Chen, C. Liu, J. Xu, A. Maxwell, W. Zhou, Y. Yang, Q. Zhou, A. S. R. Bati, H. Wan, Z. Wang, L. Zeng, J. Wang, P. Serles, Y. Liu, S. Teale, Y. Liu, M. I. Saidaminov, M. Li, N. Rolston, S. Hoogland, T. Filleter, M. G. Kanatzidis, B. Chen, Z. Ning, E. H. Sargent, *Science* **2024**, 384, 189-193.
- [43] J. Zhou, L. Tan, Y. Liu, H. Li, X. Liu, M. Li, S. Wang, Y. Zhang, C. Jiang, R. Hua, W. Tress, S. Meloni, C. Yi, *Joule* **2024**, 8, 1-16.
- [44] S. Albrecht, M. Saliba, J. Pablo C. Baena, F. Lang, L. Kegelmann, M. Mews, L. Steier, A. Abate, J. Rappich, L. Korte, R. Schlatmann, M. Khaja Nazeeruddin, A. Hagfeldt, M. Grätzel, B. Rech, *Energy Environ. Sci.* **2016**, 9, 81-88.
- [45] J. Werner, L. Barraud, A. Walter, M. Bräuninger, F. Sahli, D. Sacchetto, N. Tétreault, B. P.-Salomon, S.-J. Moon, C. Allebé, M. Despeisse, S. Nicolay, S. D. Wolf, B. Niesen, C. Ballif, *ACS Energy Lett.* **2016**, 1, 474-480.
- [46] K. A. Bush, A. F. Palmstrom, Z. J. Yu, M. Boccard, R. Checharoen, J. P. Mailoa, D. P. McMeekin, R. L. Z. Hoye, C. D. Bailie, T. Leijtens, I. M. Peters, M. C. Minichetti, N. Rolston, R. Prasanna, S. Sofia, D. Harwood, W. Ma, F. Moghadam, H. J. Snaith, T. Buonassisi, Z. C. Holman, S. F. Bent, M. D. McGehee, *Nat. Energy* **2017**, 2, 17009.
- [47] K. A. Bush, S. Manzoor, K. Frohna, Z. J. Yu, Z. J. Yu, J. A. Raiford, A. F. Palmstrom, H.-P. Wang, R. Prasanna, S. F. Bent, Z. C. Holman, M. D. McGehee, *ACS Energy Lett.* **2018**, 3, 2173-2180.
- [48] F. Sahli, J. Werner, B. A. Kamino, M. Bräuninger, R. Monnard, B. P. Salomon, L. Barraud, L. Ding, J. J. Diaz Leon, D. Sacchetto, G. Cattaneo, M. Despeisse, M. Boccard, S. Nicolay, Q. Jeangros, B. Niesen, C. Ballif, *Nat. Mater.* **2018**, 17, 820-826.
- [49] M. Jošt, E. Köhnen, A. B. M.-Vilches, B. Lipovšek, K. Jäger, B. Macco, A. A.-Ashouri, J. Krč, L. Korte, B. Rech, R. Schlatmann, M. Topič, B. Stannowski, S. Albrecht, *Energy Environ. Sci.* **2018**, 11, 3511-3523.

- [50] G. Nogay, F. Sahli, J. Werner, R. Monnard, M. Boccard, M. Despeisse, F.-J. Haug, Q. Jeangros, A. Ingenito, C. Ballif, *ACS Energy Lett.* **2019**, 4, 844-845.
- [51] B. Chen, Z. Yu, K. Liu, X. Zheng, Y. Liu, J. Shi, D. Spronk, P. N. Rudd, Z. Holman, J. Huang, *Joule* **2019**, 3, 177-190.
- [52] Bo Chen, Z. J. Yu, S. Manzoor, S. Wang, W. Weigand, Z. Yu, G. Yang, Z. Ni, X. Dai, Z. C. Holman, J. Huang, *Joule* **2020**, 4, 850-864.
- [53] E. Lamanna, F. Matteocci, E. Calabrò, L. Serenelli, E. Salza, L. Martini, F. Menchini, M. Izzi, A. Agresti, S. Pescetelli, S. Bellani, A. E. D. R. Castillo, F. Bonaccorso, M. Tucci, A. D. Carlo, *Joule* **2020**, 4, 865-881.
- [54] J. Xu, C. C. Boyd, Z. J. Yu, A. F. Palmstrom, D. J. Witter, B. W. Larson, R. M. France, J. Werner, S. P. Harvey, E. J. Wolf, W. Weigand, S. Manzoor, M. F. A. M. v. Hest, J. J. Berry, J. M. Luther, Z. C. Holman, M. D. McGehee, *Science* **2020**, 367, 1097-1104.
- [55] A. A.-Ashouri, E. Köhnen, B. Li, A. Magomedov, H. Hempel, P. Caprioglio, J. A. Márquez, A. B. M. Vilches, E. Kasparavicius, J. A. Smith, N. Phung, D. Menzel, M. Grischek, L. Kegelmann, D. Skroblin, C. Gollwitzer, T. Malinauskas, M. Jošt, G. Matič, B. Rech, R. Schlatmann, M. Topič, L. Korte, A. Abate, B. Stannowski, D. Neher, M. Stolterfoht, T. Unold, V. Getautis, S. Albrecht, *Science* **2020**, 370, 1300-1309.
- [56] J. Liu, E. Aydın, J. Yin, M. D. Bastiani, F. H. Isikgor, A. U. Rehman, E. Yengel, E. Ugur, G. T. Harrison, M. Wang, Y. Gao, J. I. Khan, M. Babics, T. G. Allen, A. S. Subbiah, K. Zhu, X. Zheng, W. Yan, F. Xu, M. F. Salvador, O. M. Bakr, T. D. Anthopoulos, M. Lanza, O. F. Mohammed, F. Laquai, S. D. Wolf, *Joule* **2021**, 5, 3169-3186.
- [57] G. Yang, Z. Ni, Z. J. Yu, B. W. Larson, Z. Yu, B. Chen, A. Alasfour, X. Xiao, J. M. Luther, Z. C. Holman, J. Huang, *Nat. Photon.* **2022**, 16, 588-594.
- [58] L. Mao, T. Yang, H. Zhang, J. Shi, Y. Hu, P. Zeng, F. Li, J. Gong, X. Fang, Y. Sun, X. Liu, J. Du, A. Han, L. Zhang, W. Liu, F. Meng, X. Cui, Z. Liu, M. Liu, *Adv. Mater.* **2022**, 34, 2206193.
- [59] J. Liu, M. D. Bastiani, E. Aydın, G. T. Harrison, Y. Gao, R. R. Pradhan, M. K. Eswaran, M. Mandal, W. Yan, A. Seitkhan, M. Babics, A. S. Subbiah, E. Ugur, F. Xu, L. Xu, M. Wang, A. u. Rehman, A. Razzaq, J. Kang, R. Azmi, A. A. Said, F. H. Isikgor, T. G. Allen, D. Andrienko, U. Schwingenschlögl, F. Laquai, S. D. Wolf, *Science* **2022**, 377, 302-306.
- [60] P. Tockhorn, J. Sutter, A. Cruz, P. Wagner, K. Jäger, D. Yoo, F. Lang, M. Grischek, B. Li, J. Li, O. Shargaieva, E. Unger, A. A.-Ashouri, E. Köhnen, M. Stolterfoht, D. Neher, R. Schlatmann, B. Rech, B. Stannowski, S. Albrecht, C. Becker, *Nat. Nanotechnol.* **2022**, 17, 1214-1221.
- [61] S. Mariotti, E. Köhnen, F. Scheler, K. Sveinbjörnsson, L. Zimmermann, M. Piot, F. Yang, B. Li, J. Warby, A. Musiienko, D. Menzel, F. Lang, S. Keßler, I. Levine, D. Manton, A. A.-Ashouri, M. S. Härtel, K. Xu, A. Cruz, J. Kurpiers, P. Wagner, H. Köbler, J. Li, A. Magomedov, D. Mecerreyes, E. Unger, A. Abate, M. Stolterfoht, B. Stannowski, R. Schlatmann, L. Korte, S. Albrecht, *Science* **2023**, 381, 63-69.
